# Supplementary material
Source: HighWire-hosted journal article supplement (https://bmjopen.bmj.com/content/9/2/e025285)
Supplement: inline-supplementary-material-1 [file inline-supplementary-material-1.pdf]

## Appendix

Smokers' response to each smoking rationalization item (N = 3710)

| Smoking rationalization                                                                                                   | Agree or totally agree<br>n(%) |
|---------------------------------------------------------------------------------------------------------------------------|--------------------------------|
| <b>Smoking functional beliefs</b>                                                                                         |                                |
| Smoking can relieve tension and stress.                                                                                   | 2583(69.7)                     |
| Smoking can eliminate fatigue and be refreshing.                                                                          | 2589(69.8)                     |
| Smoking is good for inspiration and active thinking.                                                                      | 2028(54.7)                     |
| Smoking is a good way to kill time.                                                                                       | 2031(54.8)                     |
| Smoking can reduce interpersonal distance and make social interaction easier.                                             | 2348(63.4)                     |
| <b>Risk generalization beliefs</b>                                                                                        |                                |
| A lot of non-smokers also get lung cancer.                                                                                | 2215(59.8)                     |
| Air pollution, food safety and life stress is much more dangerous to health than smoking.                                 | 2027(54.7)                     |
| If smoking was so bad for health, the government would have banned tobacco sales.                                         | 1793(48.3)                     |
| <b>Social acceptability beliefs</b>                                                                                       |                                |
| There are so many smokers in society, so it's hard for you to be different.                                               | 1677(45.2)                     |
| Many famous people smoke, so it is normal to smoke.                                                                       | 1621(43.7)                     |
| Smoking is pretty normal for men.                                                                                         | 1915(51.6)                     |
| Smoking is part of my lifestyle that others can't interfere with.                                                         | 1779(48.0)                     |
| I will consider quitting smoking only if the government closes tobacco factories.                                         | 1605(43.3)                     |
| Lots of doctors smoke, so they cannot convince me to quit.                                                                | 1635(44.1)                     |
| <b>Safe smoking beliefs</b>                                                                                               |                                |
| If you don't inhale the smoke into the lungs, the harm is minimized.                                                      | 1526(41.2)                     |
| People like me who do not smoke many cigarettes are not at risk of smoking health problems.                               | 1236(33.3)                     |
| Low tar cigarettes can reduce the harms of smoking/is less harm.                                                          | 1633(44.0)                     |
| It's safe to smoke high quality cigarettes.                                                                               | 1483(40.0)                     |
| <b>Self-exempting beliefs</b>                                                                                             |                                |
| I have not experienced any harm to my health.                                                                             | 1570(42.3)                     |
| I think I may have genes which protect me from the harms of smoking.                                                      | 1047(28.3)                     |
| Smoking is not always bad for people because many smokers live long lives while many non-smokers don't.                   | 1326(35.8)                     |
| There is still insufficient medical evidence to prove that smoking is harmful.                                            | 1537(41.4)                     |
| The fact that I can still smoke means my health status is not bad.                                                        | 1382(37.3)                     |
| <b>Quitting is harmful beliefs</b>                                                                                        |                                |
| If you have smoked for a long time, the body adapts to cigarettes and reaches a balance, so quitting will lead to illness | 1643(44.3)                     |
| If you try to quit and fail, you will smoke more than before, so you would rather not to quit.                            | 1573(42.4)                     |
| After quitting smoking, I will gain weight, which is also harmful to health.                                              | 1101(29.7)                     |
